# Supplementary material for: Atomically precise alkynyl-protected Ag19Cu2 nanoclusters: synthesis, structure analysis, and electrocatalytic CO2 reduction application
Source: Royal Society of Chemistry journal article supplement (doi:10.1039/d4nr02702g), 2024-01-01
Supplement: d4nr02702g1.pdf [file d4nr02702g1.pdf]

## Electronic Supplementary Information for

# **Atomically precise alkynyl-protected Ag<sub>19</sub>Cu<sub>2</sub> nanoclusters: Synthesis, structure analysis, and electrocatalytic CO<sub>2</sub> reduction application**

Xin Zhu,<sup>a#</sup> Pan Zhu,<sup>b#</sup> Xuzi Cong,<sup>c#</sup> Guanyu Ma,<sup>a</sup> Qing Tang,<sup>\*b</sup> Likai Wang,<sup>\*c</sup> and Zhenghua Tang<sup>\*ad</sup>

<sup>a</sup> New Energy Research Institute, School of Environment and Energy, South China University of Technology, Guangzhou Higher Education Mega Center, Guangzhou, 510006, China.

E-mail: zhht@scut.edu.cn

<sup>b</sup> Chongqing Key Laboratory of Theoretical and Computational Chemistry, School of Chemistry and Chemical Engineering, Chongqing University, Chongqing 401331, China.

E-mail: qingtang@cqu.edu.cn.

<sup>c</sup> School of Chemistry and Chemical Engineering, Shandong University of Technology, Zibo, 255049, China.

E-mail: lkwangchem@sdut.edu.cn

<sup>d</sup> Key Laboratory of Functional Inorganic Materials Chemistry, Ministry of Education, Heilongjiang University, Harbin, 150001, China.

#: These authors contributed equally.

## Experimental section

**Materials and reagents.** All chemicals and reagents were used as received without further purification. Methanol (MeOH), ethanol (EtOH), dichloromethane (DCM), trichloromethane (CHCl<sub>3</sub>), *n*-hexane, and toluene were purchased from Caiyunfei Chemical Reagents (Tianjin, China). Triethylamine (Et<sub>3</sub>N, 99.5%), sodium cyanoborohydride (NaBH<sub>3</sub>CN, 95%), silver trifluoroacetate (CF<sub>3</sub>CO<sub>2</sub>Ag), copper powder, copper (II) trifluoroacetate hydrate (Cu(CF<sub>3</sub>CO<sub>2</sub>)<sub>2</sub>), triphenylphosphine (PPh<sub>3</sub>), and 3, 5-bis(trifluoromethyl)phenylacetylene (3, 5-(CF<sub>3</sub>)<sub>2</sub>PhCuCH) were purchased from Energy Chemical (Shanghai, China). Deionized water with a resistivity of 18.3 MΩ cm<sup>-1</sup> was obtained using a Barnstead Nanopure water system.

**Physical measurements and instrumentation.** The surface chemical compositions and valence states were examined by X-ray photoelectron spectroscopy (XPS, Phi X-tool instrument). UV-visible absorption spectra of the clusters were recorded by a Shimadzu 2600 spectrophotometer. The data collection for the Ag<sub>19</sub>Cu<sub>2</sub>(C≡CAr<sup>F</sup>)<sub>12</sub>(PPh<sub>3</sub>)<sub>6</sub>Cl<sub>6</sub> nanoclusters was performed on an Agilent Technologies Super Nova single-crystal diffractometer using 100 Mo Kα radiation (λ = 0.71073 Å), respectively. In the Olex2 graphical interface, SHELXT was used for structural solution and SHELXL for refinement. All non-hydrogen atoms were first subjected to isotropic refinement and then to anisotropic refinement. All hydrogen atoms of the ligand are placed at computational positions with fixed isotropic thermal parameters and are included in the final stage of the structure factor calculation for the full matrix least squares refinement.

**Synthesis of Ag<sub>19</sub>Cu<sub>2</sub>(C≡CAr<sup>F</sup>)<sub>12</sub>(PPh<sub>3</sub>)<sub>6</sub>Cl<sub>6</sub> nanoclusters.** The Ag<sub>19</sub>Cu<sub>2</sub> nanoclusters were synthesized by a direct reduction method from the mixed precursors (Scheme S1). Briefly, 60 mg of AgC≡CR and 30 mg of AgBF<sub>4</sub> were first co-dispersed in dichloromethane (CH<sub>2</sub>Cl<sub>2</sub>) for 30 mins, then 10 mg of CuCl was added, then the mixture was reduced using a borane tert-butylamine complex as the reducing agent in the presence of the PPh<sub>3</sub> ligand (60 mg) at 25 °C. After the reaction is completed, the organic layer is washed with deionized water, and then, *n*-hexane is diffused into the CH<sub>2</sub>Cl<sub>2</sub> layer of the nanoclusters at 0 °C for 2h. The dark-red block-like single crystals (See Figure S1 for the microscope photo) suitable for the X-ray diffraction are obtained after about 15 days. The yield of Ag<sub>19</sub>Cu<sub>2</sub> clusters is calculated as 12.6% (based on Cu). The CCDC number of the Ag<sub>19</sub>Cu<sub>2</sub>(C≡CAr<sup>F</sup>)<sub>12</sub>(PPh<sub>3</sub>)<sub>6</sub>Cl<sub>6</sub> cluster is 2366717.

**Preparation of the Ag<sub>19</sub>Cu<sub>2</sub>/CNTs catalyst.** In a typical trial, 2 mg of Ag<sub>19</sub>Cu<sub>2</sub> and 1 mg of carbon nanotubes were co-dissolved in 0.5 mL of ethanol, and were sonicated for 30 mins to prepare a catalyst ink.

**Electrochemical measurements.** The eCO<sub>2</sub>RR measurement was tested using a three-electrode system at the electrochemical workstation (CHI 660C, Shanghai). The gases are monitored by gas chromatography (GC, Hua ai 9560). To prepare the catalytic electrode, 666 μL of the ink and 30 μL of the nafion solution were dropwisely cast onto the gas diffusion carbon paper with an area of 2 cm \* 0.5 cm, and the coating mass is calculated as 2 mg/cm<sup>2</sup>. The working electrode was a gas diffusion carbon paper, the counter electrode was a platinum sheet, the reference electrode was an Ag/AgCl electrode, and the anion exchange membrane was used in the center to separate the anion and cation chambers. Carbon dioxide gas was introduced at a flow rate of 24 mL/min, and the cathode electrolyte was 1 M KOH (pH = 14).

The potentials in this study are converted into reversible hydrogen electrode (RHE) potentials according to the following equation:

$$E_{\text{RHE}} = E_{\text{Ag}/\text{AgCl}} + 0.0591 \text{ pH} + 0.197$$

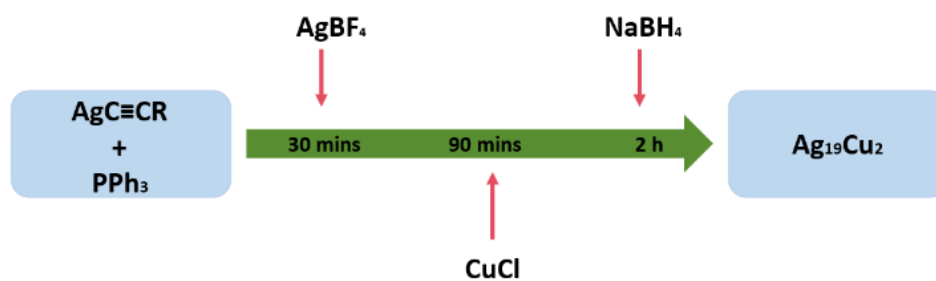

**Scheme S1.** The synthetic route for Ag<sub>19</sub>Cu<sub>2</sub> NCs.

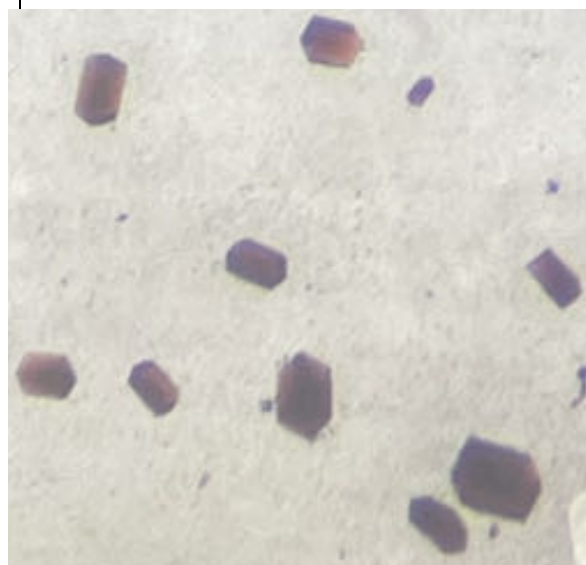

**Figure S1.** The image of Ag<sub>19</sub>Cu<sub>2</sub> crystals under an optical microscope.

**a**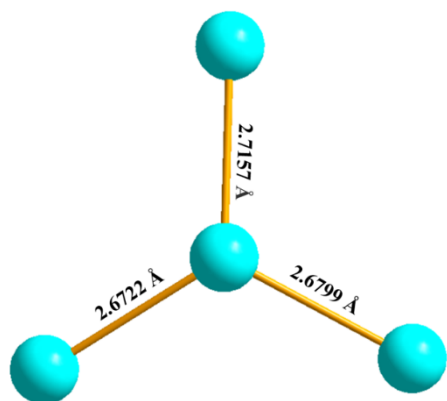**b**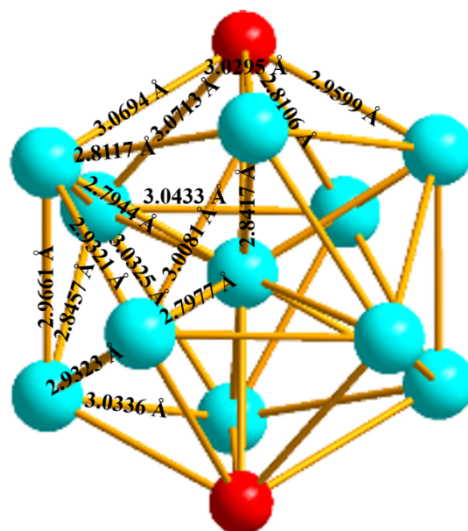

**Figure S2.** Metal bond length in (a)  $\text{Ag}_4$  unit and (b)  $\text{Ag}_{11}\text{Cu}_2$  unit. Color labels: Ag, blue; Cu, red; Cl, tan.

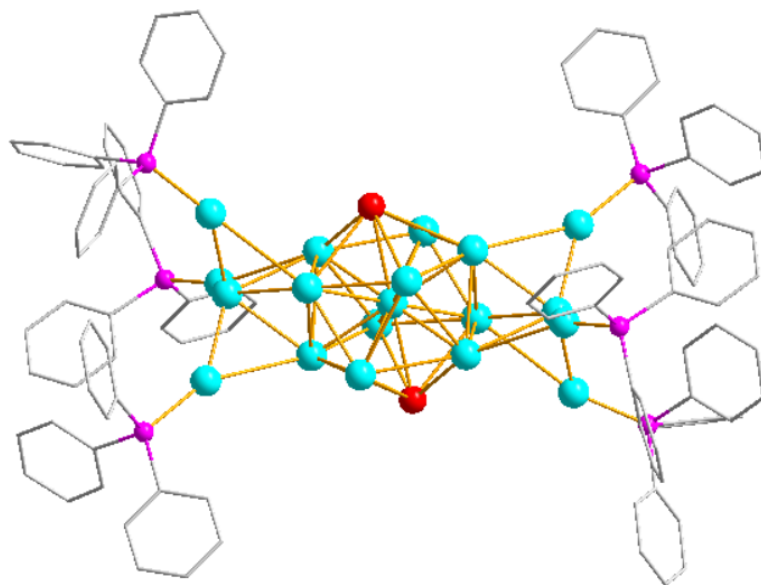

**Figure S3.** Coordination between the 6 PPh<sub>3</sub> ligands and Ag atoms in Ag<sub>19</sub>Cu<sub>2</sub>. Color code: Ag, blue; Cu, red; C, white; P, pink. All hydrogen atoms are omitted for clarity.

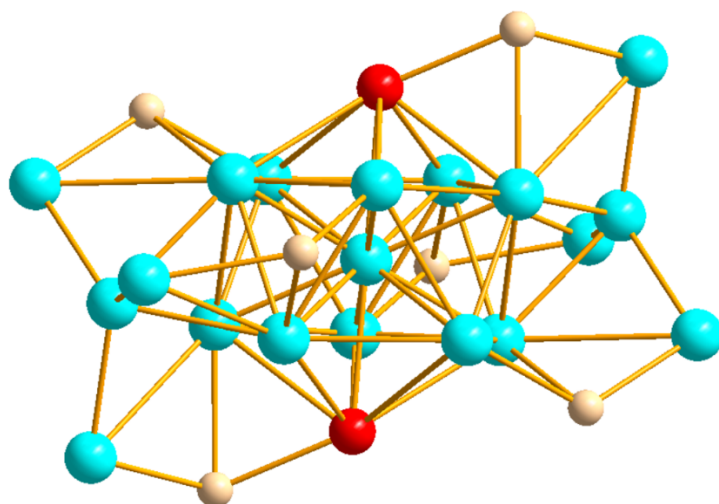

**Figure S4.** Coordination between the 6 Cl and Ag atoms in Ag<sub>19</sub>Cu<sub>2</sub>. Color code: Ag, blue; Cu, red; C, white; Cl, tan. All hydrogen atoms are omitted for clarity.

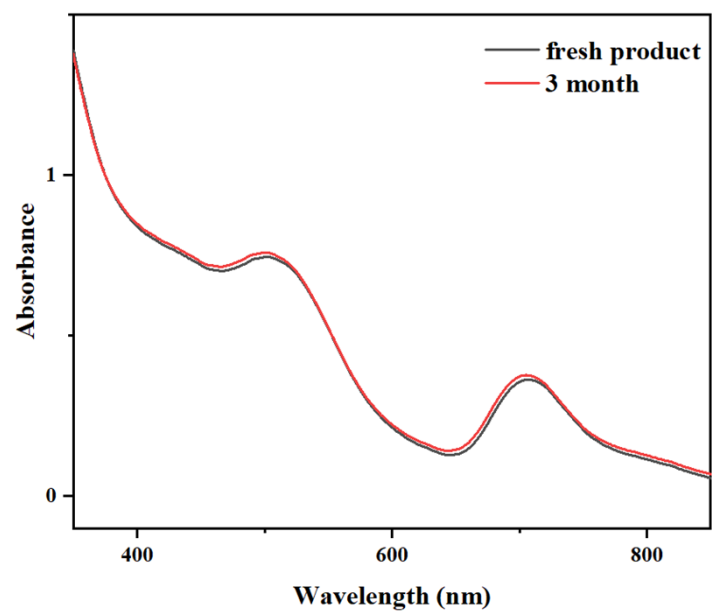

**Figure S5.** Absorption spectra of Ag<sub>19</sub>Cu<sub>2</sub> clusters before and after 3 months.



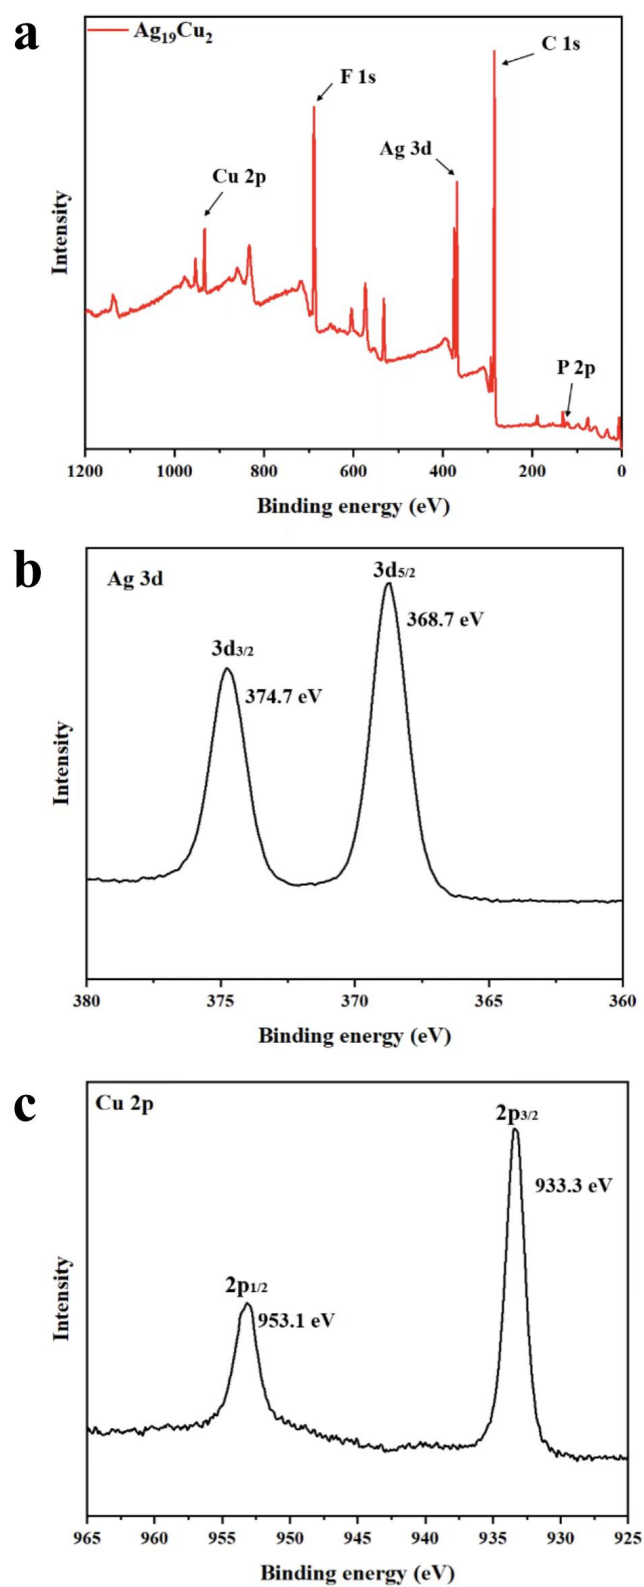

**Figure S6.** (a) XPS survey-scan spectra of the Ag<sub>19</sub>Cu<sub>2</sub> nanoclusters, (b) High resolution XPS spectra of Ag3d, (c) Cu2p of the Ag<sub>19</sub>Cu<sub>2</sub> nanoclusters.

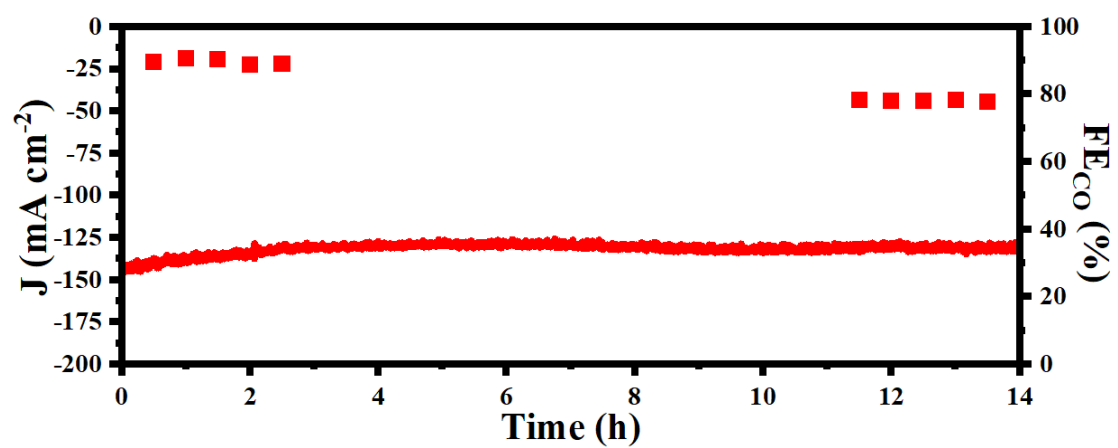

**Figure S7.** Long term stability test of the  $\text{Ag}_{19}\text{Cu}_2/\text{CNTs}$  catalyst in  $\text{eCO}_2\text{RR}$ .

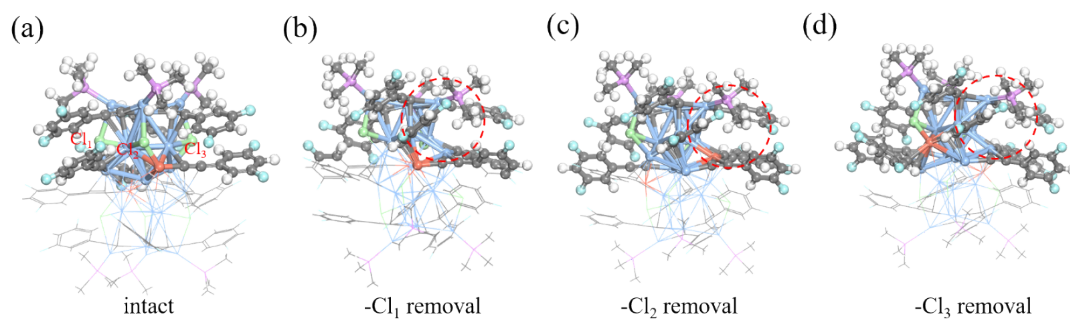

**Figure S8.** Schematic presentation of intact  $\text{Ag}_{19}\text{Cu}_2$  nanoclusters (a) and  $\text{Ag}_{19}\text{Cu}_2$  nanoclusters with different -Cl ligands removed respectively (b-d). Color legend: Ag, baby blue; Cu, dark orange; C, grey; Cl, light green; F, cyan; P, purple; H, white. For clarity, some of the ligands and metals are represented by line modes.

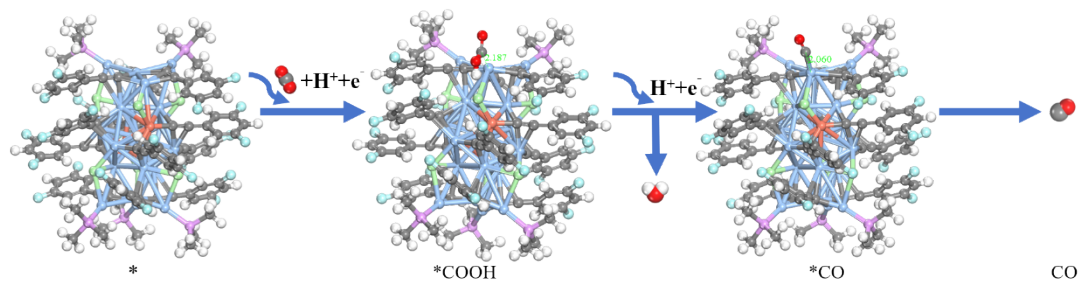

**Figure S9.** Schematic presentation of the electrocatalytic CO<sub>2</sub> reduction process on the [Ag<sub>19</sub>Cu<sub>2</sub>(C≡CR)<sub>12</sub>(P(CH<sub>3</sub>)<sub>3</sub>)<sub>5</sub>Cl<sub>6</sub>]<sup>+</sup> cluster. Color legend: Ag, baby blue; Cu, dark orange; C, grey; Cl, light green; F, cyan; P, purple; H, white; O, red.

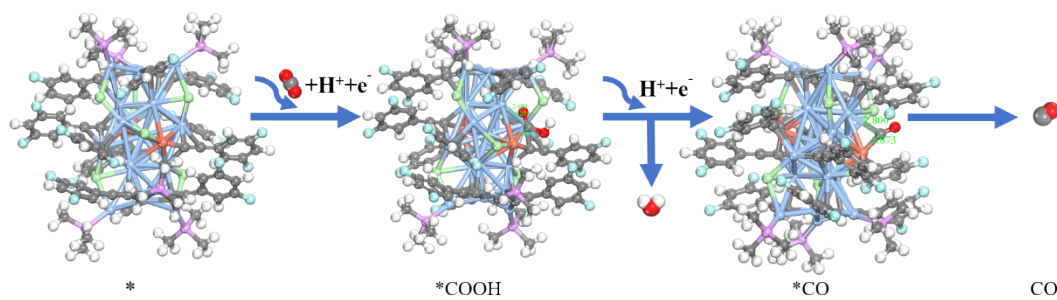

**Figure S10.** Schematic presentation of the electrocatalytic CO<sub>2</sub> reduction process on the Ag<sub>19</sub>Cu<sub>2</sub>(C≡CR)<sub>11</sub>(P(CH<sub>3</sub>)<sub>3</sub>)<sub>6</sub>Cl<sub>6</sub><sup>+</sup>-(1) cluster. Color legend: Ag, baby blue; Cu, dark orange; C, grey; Cl, light green; F, cyan; P, purple; H, white; O, red.

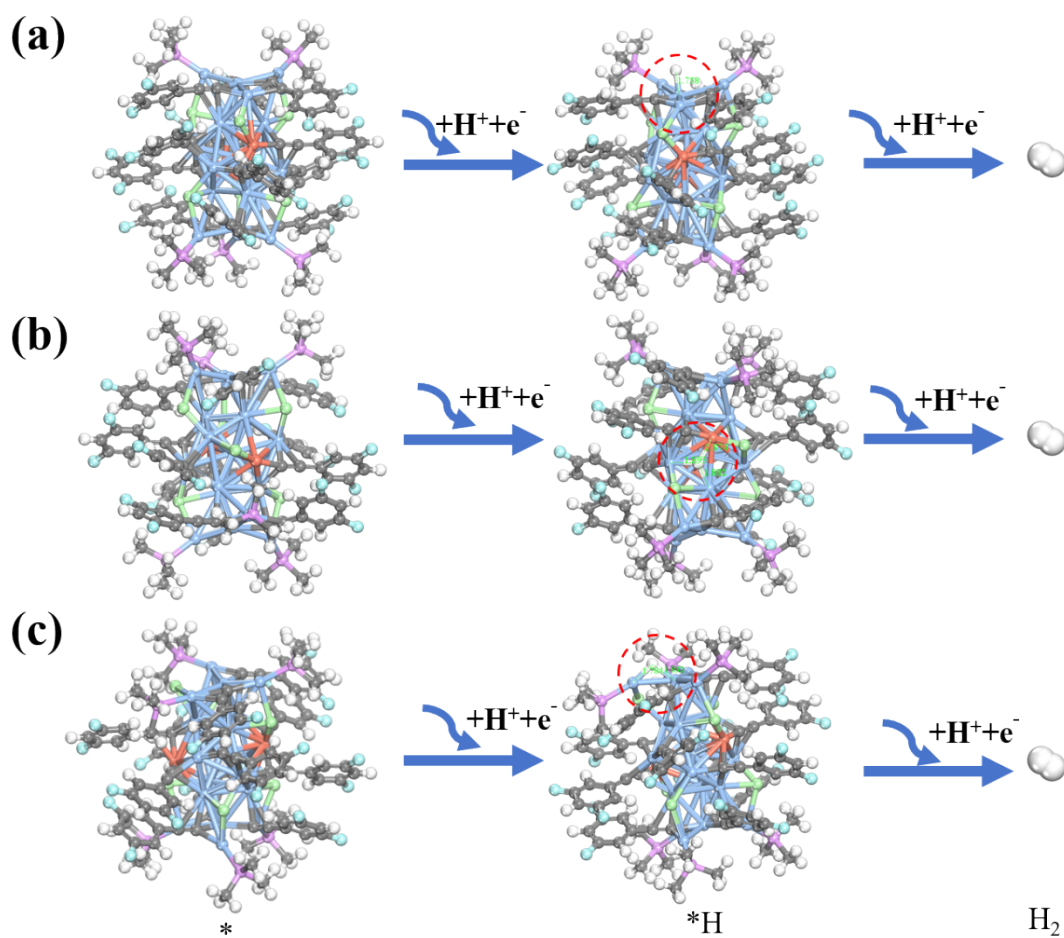

**Figure S11.** (a)-(c) Schematic presentation of the electrocatalytic hydrogen evolution process on the  $[Ag_{19}Cu_2(C\equiv CR)_{12}(P(CH_3)_3)_5Cl_6]^+$ ,  $[Ag_{19}Cu_2(C\equiv CR)_{11}(P(CH_3)_3)_6Cl_6]^{+(-1)}$ ,  $[Ag_{19}Cu_2(C\equiv CR)_{11}(P(CH_3)_3)_6Cl_6]^{+(-2)}$  clusters respectively. Color legend: Ag, baby blue; Cu, dark orange; C, green; Cl, light green; F, cyan; P, purple; H, white.

**Table S1.** The structure parameters for Ag<sub>19</sub>Cu<sub>2</sub>.

---

|                              |                                                                                                                       |                |
|------------------------------|-----------------------------------------------------------------------------------------------------------------------|----------------|
| Identification code          | Ag <sub>19</sub> Cu <sub>2</sub> (C≡CAr <sup>F</sup> ) <sub>12</sub> (PPh <sub>3</sub> ) <sub>6</sub> Cl <sub>6</sub> |                |
| Empirical formula            | C <sub>232</sub> H <sub>128</sub> Ag <sub>19</sub> C <sub>16</sub> Cu <sub>2</sub> F <sub>72</sub> P <sub>6</sub>     |                |
| Formula weight               | 6858.470                                                                                                              |                |
| Temperature/K                | 100                                                                                                                   |                |
| Crystal system               | triclinic                                                                                                             |                |
| Space group                  | P -1                                                                                                                  |                |
| Unit cell dimensions         | a = 19.6392(2) Å                                                                                                      | α = 67.042(1)° |
|                              | b = 19.8263(2) Å                                                                                                      | β = 62.657(1)° |
|                              | c = 20.3821(2) Å                                                                                                      | γ = 75.865(1)° |
| Volume                       | 6470.59(10) Å <sup>3</sup>                                                                                            |                |
| Z                            | 1                                                                                                                     |                |
| Density (calculated)         | 1.760 g/cm <sup>3</sup>                                                                                               |                |
| Absorption coefficient       | 1.463mm <sup>-1</sup>                                                                                                 |                |
| F(000)                       | 3311                                                                                                                  |                |
| Crystal size                 | 0.2 × 0.2 × 0.06 mm <sup>3</sup>                                                                                      |                |
| Radiation                    | Mo K <sub>α</sub> (λ = 0.71073)                                                                                       |                |
| 2θ range for data collection | 2.3470 to 30.6000                                                                                                     |                |
| Index range                  | -26 ≤ h ≤ 27, -25 ≤ k ≤ 28, -28 ≤ l ≤ 29                                                                              |                |
| Reflections collected        | 200745                                                                                                                |                |
| Largest diff. peak/hole      | 3.393/-4.116e Å <sup>-3</sup>                                                                                         |                |

---

**Table S2.** The detailed electronic energy ( $E^*$ ), zero-point energy ( $E_{ZPE}$ ), entropy corrections (TS), and free energy ( $G$ ) of isolated molecule during electrochemical CO<sub>2</sub>RR and HER.

| Species         | $E^*$  | $E_{ZPE}$ | TS   | $G$    |
|-----------------|--------|-----------|------|--------|
| CO <sub>2</sub> | -23.11 | 0.31      | 0.66 | -23.36 |
| CO              | -14.81 | 0.13      | 0.61 | -15.63 |
| H <sub>2</sub>  | -6.76  | 0.27      | 0.40 | -6.89  |
